# Supplementary material for: SIGIRR and TNFAIP3 Are Differentially Expressed in Both PBMC and TNF-α Secreting Cells of Patients With Major Depressive Disorder
Source: PubMed Central journal article supplement (PMC8356912; doi:10.3389/fpsyt.2021.698257), 2021-07-28
Supplement: Table_1.pdf [file Table_1.pdf]

**Supplementary Table 1.** Medications used by patients with MDD

| Category | Name         | Number (%) | Categorical total |
|----------|--------------|------------|-------------------|
| SSRI     | Paroxetine   | 11 (29.7%) | 21 (56.8%)        |
|          | Fluoxetine   | 6 (16.2%)  |                   |
|          | Escitalopram | 4 (10.8%)  |                   |
| SNRI     | Duloxetine   | 6 (16.2%)  | 9 (24.3%)         |
|          | Venlafaxine  | 3 (8.1%)   |                   |
| Misc.    | Mirtazapine  | 2 (5.4%)   | 7 (18.9%)         |
|          | Lithium      | 2 (5.4%)   |                   |
|          | Trazodone    | 1 (2.7%)   |                   |
|          | Agomelatine  | 1 (2.7%)   |                   |
|          | Valproate    | 1 (2.7%)   |                   |

MDD: major depressive disorder; SNRI: serotonin–norepinephrine reuptake inhibitor; SSRI: selective serotonin reuptake inhibitor
